# Supplementary material for: Sex‐specific telomere length and dynamics in relation to age and reproductive success in Cory’s shearwaters
Source: PubMed Central journal article supplement (PMC7216837; doi:10.1111/mec.15399), 2020-03-29
Supplement: MEC-29-1344-s001.pdf [file MEC-29-1344-s001.pdf]

## Supplemental Information for:

### Sex-specific telomere length and dynamics in relation to age and reproductive success in Cory's Shearwaters

Christina Bauch, Marie Claire Gatt, José Pedro Granadeiro  
& Simon Verhulst, Paulo Catry

#### Table of Contents:

|                                                                                                                                                   |        |
|---------------------------------------------------------------------------------------------------------------------------------------------------|--------|
| <b>Table S1</b><br>Telomere length in relation to exact age (cross-sectional analysis)                                                            | Page 2 |
| <b>Table S2</b><br>Telomere length in relation to average hatchling production                                                                    | Page 3 |
| <b>Table S3</b><br>Telomere length in relation to average fledgling production in birds of exactly known ages                                     | Page 4 |
| <b>Table S4</b><br>Telomere length in relation to average fledgling production with a weighing factor to account for individual data contribution |        |

**Table S1.** Linear mixed effects models testing for (A) sex differences in telomere length, and the cross-sectional relationship between age and telomere length (bp/year) in adult Cory's Shearwaters with exactly known ages: (B) males, (C) females.

| telomere length                                    | model terms            | estimate   | std. error | df    | <i>t</i> | <i>p</i> |  |
|----------------------------------------------------|------------------------|------------|------------|-------|----------|----------|--|
| (A) both sexes<br>n=80 samples /<br>52 individuals | <i>intercept</i>       | 9298.9     | 215.4      | 39.7  | 43.17    | <0.001   |  |
|                                                    | <i>fixed effects:</i>  |            |            |       |          |          |  |
|                                                    | age                    | -35.1      | 11.3       | 53.84 | -3.12    | 0.003    |  |
|                                                    | sex                    | -452.8     | 290.9      | 46.5  | -1.56    | 0.126    |  |
|                                                    |                        | $\sigma^2$ |            |       |          |          |  |
|                                                    | <i>random effects:</i> |            |            |       |          |          |  |
|                                                    | bird ID                | 0.723      |            |       |          |          |  |
| gel ID                                             | 0.191                  |            |            |       |          |          |  |
| residual                                           | 0.086                  |            |            |       |          |          |  |
| (B) males<br>n=71 samples /<br>47 individuals      | <i>intercept</i>       | 9333.9     | 205.3      | 49.4  | 45.47    | <0.001   |  |
|                                                    | <i>fixed effects:</i>  |            |            |       |          |          |  |
|                                                    | age                    | -37.5      | 11.5       | 50.3  | -3.27    | 0.002    |  |
|                                                    |                        | $\sigma^2$ |            |       |          |          |  |
|                                                    | <i>random effects:</i> |            |            |       |          |          |  |
| bird ID                                            | 0.912                  |            |            |       |          |          |  |
| residual                                           | 0.088                  |            |            |       |          |          |  |
| (C) females<br>n= 9 samples /<br>5 individuals     | <i>intercept</i>       | 8679.6     | 885.5      | 3.4   | 9.80     | 0.001    |  |
|                                                    | <i>fixed effects:</i>  |            |            |       |          |          |  |
|                                                    | age                    | -20.57     | 41.4       | 3.4   | -0.50    | 0.649    |  |
|                                                    |                        | $\sigma^2$ |            |       |          |          |  |
|                                                    | <i>random effects:</i> |            |            |       |          |          |  |
| bird ID                                            | 0.939                  |            |            |       |          |          |  |
| residual                                           | 0.061                  |            |            |       |          |          |  |

**Table S2.** Linear mixed effects model testing for effects of long-term hatching success (average hatchling production over the past up to 13 years) on telomere length. **(A)** Both sexes (estimate for females relative to males), **(B)** males, **(C)** females.

| telomere length     | model terms            | estimate | std. error                   | df    | t     | p      |
|---------------------|------------------------|----------|------------------------------|-------|-------|--------|
| (A)<br>n=150 birds  | <i>intercept</i>       | 9611.0   | 237.5                        | 135.1 | 40.5  | <0.001 |
|                     | <i>fixed effects:</i>  |          |                              |       |       |        |
|                     | age                    | -18.5    | 9.7                          | 144.3 | -1.91 | 0.058  |
|                     | hatching success       | -683.1   | 262.0                        | 138.9 | -2.61 | 0.010  |
|                     | sex                    | -1303.9  | 278.5                        | 142.8 | -4.68 | <0.001 |
|                     | hatching success * sex | 1501.1   | 364.5                        | 141.1 | 4.12  | <0.001 |
|                     |                        |          | <u><math>\sigma^2</math></u> |       |       |        |
|                     | <i>random effects:</i> |          |                              |       |       |        |
|                     | gel ID                 | 0.069    |                              |       |       |        |
|                     | residual               | 0.931    |                              |       |       |        |
| (B)<br>n=82 males   | <i>intercept</i>       | 9645.5   | 245.1                        |       | 39.36 | <0.001 |
|                     | <i>fixed effects:</i>  |          |                              |       |       |        |
|                     | age                    | -20.3    | 11.8                         |       | -1.71 | 0.091  |
|                     | hatching success       | -697.1   | 265.8                        |       | -2.62 | 0.011  |
| (C)<br>n=68 females | <i>intercept</i>       | 8241.9   | 279.6                        |       | 29.48 | <0.001 |
|                     | <i>fixed effects:</i>  |          |                              |       |       |        |
|                     | age                    | -14.9    | 16.5                         |       | -0.90 | 0.369  |
|                     | hatching success       | 813.6    | 297.6                        |       | 2.73  | 0.008  |

Model fit (conditional R<sup>2</sup>): (A) R<sup>2</sup>=0.204, (B) R<sup>2</sup>=0.142, (C) R<sup>2</sup>=0.101

**Table S3.** Linear mixed effects model testing for effects of long-term reproductive success (average fledgling production over the past up to 13 years) on telomere length in male Cory's shearwater with exactly known ages. (Available sample size for females too small for a meaningful statistical result).

| telomere length | model terms           | estimate | std. error | <i>t</i> | <i>p</i> |
|-----------------|-----------------------|----------|------------|----------|----------|
|                 | <i>intercept</i>      | 9596.8   | 261.8      | 36.66    | <0.001   |
| n=36 males      | <i>fixed effects:</i> |          |            |          |          |
|                 | age                   | -25.5    | 12.4       | -2.05    | 0.048    |
|                 | reprod. success       | -670.1   | 284.3      | -2.36    | 0.025    |

**Table S4.** Linear mixed effects model testing for effects of long-term reproductive success (average fledgling production over the past up to 13 years with a weighing factor (square root of number of reproductive events) to account for individual contribution) on telomere length. **(A)** Both sexes (estimate for females relative to males), **(B)** males, **(C)** females.

| telomere length | model terms            | estimate                     | std. error | df    | <i>t</i> | <i>p</i> |
|-----------------|------------------------|------------------------------|------------|-------|----------|----------|
| (A)             | <i>intercept</i>       | 9816.4                       | 266.0      | 137.2 | 36.9     | <0.001   |
| n=150 birds     | <i>fixed effects:</i>  |                              |            |       |          |          |
|                 | age                    | -19.1                        | 10.3       | 144.0 | -1.86    | 0.065    |
|                 | reprod. success        | -1043.0                      | 304.3      | 138.4 | -3.43    | <0.001   |
|                 | sex                    | -1428.6                      | 301.3      | 138.6 | -4.74    | <0.001   |
|                 | reprod. success * sex  | 1825.4                       | 418.1      | 137.7 | 4.37     | <0.001   |
|                 |                        | <u><math>\sigma^2</math></u> |            |       |          |          |
|                 | <i>random effects:</i> |                              |            |       |          |          |
|                 | gel ID                 | 0.040                        |            |       |          |          |
|                 | residual               | 0.960                        |            |       |          |          |
| (B)             | <i>intercept</i>       | 9839.2                       | 275.2      |       | 35.8     | <0.001   |
| n=82 males      | <i>fixed effects:</i>  |                              |            |       |          |          |
|                 | age                    | -20.8                        | 12.5       |       | -1.66    | 0.100    |
|                 | reprod. success        | -1044.9                      | 304.1      |       | -3.44    | <0.001   |
| (C)             | <i>intercept</i>       | 8306.0                       | 335.5      |       | 24.76    | <0.001   |
| n=68 females    | <i>fixed effects:</i>  |                              |            |       |          |          |
|                 | age                    | -14.5                        | 17.1       |       | -0.85    | 0.401    |
|                 | reprod. success        | 771.0                        | 334.0      |       | 2.31     | 0.024    |

Model fit (conditional  $R^2$ ): (A)  $R^2=0.122$ , (B)  $R^2=0.104$ , (C)  $R^2=0.035$
